# Supplementary material
Source: publisher figshare collection journal article supplement (https://sage.figshare.com/ndownloader/files/19497338)

**Supplemental Online Appendix**  
**Underemployment in the United States and Europe**  
**David N. F. Bell and David G. Blanchflower**

**Description of U3–U9**

The various labor market underutilization variables are explained below. The numbers refer to seasonally adjusted data for July 2018. Numbers in thousands as follows: labor force = 162,245; employment = 155,965; unemployment = 6,280; PTFER = 4,567; discouraged workers = 512, and marginally attached (which includes discouraged workers) = 1,498.

U3 = Total unemployed, as a percentage of the civilian labor force (official unemployment rate) =  $6,280/(162,245) = 3.9\%$ .

U4 = Total unemployed plus discouraged workers, as a percentage of the civilian labor force plus discouraged workers =  $(6,280 + 512)/(162,245 + 512) = 4.2\%$ .

U5 = Total unemployed, plus discouraged workers, plus all other persons marginally attached to the labor force, as a percentage of the civilian labor force, plus all persons marginally attached to the labor force =  $(6,280 + 1,498)/(162,245 + 1,498) = 4.8\%$ .

U6 = Total unemployed, plus all persons marginally attached to the labor force, plus total employed part time for economic reasons, as a percentage of the civilian labor force, plus all persons marginally attached to the labor force =  $(6,280 + 1,498 + 4,567)/(162,245 + 1,498) = 7.5\%$ .

U7 = PTFER/Employed =  $4,567/155,965 = 2.9\%$ .

U8 = Discouraged/(labor force + discouraged) =  $512/(162,245 + 512) = 0.3\%$ .

U9 = Marginally attached–discouraged/(labor force + marginally attached minus discouraged) =  $1,498-512/(162,295 + 1,498-512) = 0.9\%$ .

Persons marginally attached to the labor force are those who currently are neither working nor looking for work but indicate that they want and are available for a job and have looked for work sometime in the past 12 months. Discouraged workers, a subset of the marginally attached, have given a job–market–related reason for not currently looking for work. Persons employed part time for economic reasons are those who want and are available for full-time work but have had to settle for a part-time schedule. See <https://www.bls.gov/news.release/empst.t15.htm>.

Table A.1. Increase in Weekly Hours Desired by Those Who Want More Hours (Millions)

|      | <b>AU</b> | <b>BE</b> | <b>CH</b> | <b>CY</b> | <b>DE</b> | <b>DK</b> | <b>EE</b> | <b>ES</b> | <b>FI</b> | <b>FR</b> | <b>GR</b> | <b>HR</b> | <b>HU</b> |
|------|-----------|-----------|-----------|-----------|-----------|-----------|-----------|-----------|-----------|-----------|-----------|-----------|-----------|
| 2001 | 2.6       | 2.9       | 7.5       | 0.6       |           | 2.1       | 1.4       | 40.2      | 9.2       |           | 8.1       |           | 10.0      |
| 2002 | 1.2       | 2.5       | 8.5       | 0.7       |           | 1.2       | 1.1       | 33.8      | 8.8       |           | 8.3       | 3.0       | 8.1       |
| 2003 | 1.2       | 2.8       | 7.7       | 0.8       |           | 2.2       | 1.1       | 45.5      | 9.2       | 53.7      | 8.2       | 3.2       | 10.2      |
| 2004 | 2.2       | 2.9       | 7.7       | 0.9       |           | 2.5       | 0.9       | 39.1      | 8.2       | 58.7      | 8.0       | 2.0       | 9.5       |
| 2005 | 8.3       | 3.5       | 7.5       | 0.7       | 34.8      | 1.9       | 0.6       | 24.8      | 7.0       | 61.0      | 8.0       | 1.8       | 8.7       |
| 2006 | 8.9       | 3.7       | 7.6       | 0.7       | 41.9      | 2.8       | 0.6       | 24.0      | 9.2       | 68.1      | 8.5       | 1.8       | 8.3       |
| 2007 | 9.5       | 4.0       | 8.8       | 0.7       | 39.2      | 6.9       | 0.5       | 23.2      | 7.5       | 73.0      | 8.8       | 1.6       | 8.7       |
| 2008 | 9.6       | 3.8       | 8.3       | 0.9       | 91.8      | 7.1       | 0.7       | 28.1      | 7.4       | 73.1      | 9.7       | 1.3       | 7.2       |
| 2009 | 11.1      | 3.9       | 8.8       | 1.1       | 99.8      | 6.8       | 1.3       | 33.8      | 7.7       | 73.3      | 11.1      | 1.4       | 7.1       |
| 2010 | 10.8      | 3.9       | 7.1       | 1.0       | 90.3      | 6.2       | 1.0       | 33.3      | 7.2       | 69.7      | 9.8       | 1.7       | 7.0       |
| 2011 | 10.3      | 4.6       | 7.3       | 1.1       | 82.3      | 5.9       | 0.9       | 35.7      | 7.0       | 67.9      | 10.3      | 1.9       | 8.3       |
| 2012 | 11.0      | 4.9       | 7.7       | 1.2       | 78.0      | 6.0       | 1.1       | 41.7      | 7.5       | 69.2      | 11.5      | 1.7       | 10.8      |
| 2013 | 11.0      | 5.0       | 7.7       | 1.6       | 75.0      | 6.2       | 1.2       | 43.4      | 7.6       | 85.3      | 11.7      | 2.0       | 12.3      |
| 2014 | 11.3      | 4.8       | 8.5       | 1.8       | 70.4      | 6.1       | 1.3       | 41.2      | 7.9       | 83.8      | 12.5      | 2.2       | 12.3      |
| 2015 | 12.0      | 4.8       | 8.4       | 1.7       | 66.9      | 5.7       | 1.3       | 36.8      | 8.0       | 82.2      | 13.0      | 2.7       | 11.8      |
| 2016 | 12.3      | 4.7       | 8.2       | 1.5       | 63.4      | 8.2       | 1.1       | 33.4      | 7.7       | 77.8      | 12.7      | 1.9       | 9.9       |
|      | <b>IE</b> | <b>IS</b> | <b>IT</b> | <b>LT</b> | <b>LU</b> | <b>MT</b> | <b>NL</b> | <b>NO</b> | <b>PL</b> | <b>PT</b> | <b>RO</b> | <b>SE</b> | <b>UK</b> |
| 2001 | 1.3       | 0.4       |           | 2.3       | 0.1       |           | 21.8      | 0.9       | 37.3      | 7.4       |           | 18.6      | 24.7      |
| 2002 | 1.7       | 0.4       | 6.2       | 2.1       | 0.1       |           | 22.4      | 0.9       | 38.3      | 8.9       | 19.0      | 17.2      | 24.5      |
| 2003 | 1.8       | 0.3       | 7.2       | 2.4       | 0.2       |           | 20.6      | 1.5       | 40.4      | 10.9      | 18.2      | 19.3      | 24.7      |
| 2004 | 2.3       | 0.2       | 14.9      | 1.9       | 0.2       |           | 23.2      | 1.6       | 38.2      | 6.7       | 13.9      | 18.0      | 24.0      |
| 2005 | 2.4       | 0.2       | 11.4      | 1.8       | 0.2       |           | 16.8      | 1.4       | 37.3      | 7.3       | 14.9      | 14.5      | 24.6      |
| 2006 | 2.5       | 0.2       | 11.2      | 1.7       | 0.3       |           | 19.7      | 4.7       | 36.6      | 7.9       | 13.5      | 15.2      | 26.8      |
| 2007 | 2.1       | 0.2       | 10.4      | 1.5       | 0.3       |           | 20.1      | 4.8       | 34.7      | 8.7       | 12.6      | 15.7      | 28.0      |
| 2008 | 2.8       |           | 12.0      | 1.2       | 0.3       |           | 20.7      | 5.2       | 33.6      | 9.6       | 12.4      | 15.6      | 30.0      |
| 2009 | 4.8       |           | 13.0      | 1.4       | 0.4       | 0.4       | 21.9      | 5.3       | 34.7      | 8.6       | 12.8      | 16.6      | 36.2      |
| 2010 | 4.5       |           | 12.5      | 1.4       | 0.3       | 0.5       | 19.3      | 4.9       | 33.9      | 7.8       | 12.8      | 15.1      | 39.6      |
| 2011 | 5.0       |           | 11.6      | 1.4       | 0.3       | 0.5       | 17.9      | 4.9       | 33.9      | 19.5      | 11.8      | 15.4      | 40.9      |
| 2012 | 5.4       |           | 16.3      | 1.5       | 0.4       | 0.6       | 19.0      | 5.2       | 40.3      | 20.5      | 11.4      | 16.1      | 43.1      |
| 2013 | 5.6       |           | 16.6      | 1.5       | 0.4       | 0.5       | 21.5      | 5.8       | 44.2      | 19.7      | 10.6      | 16.9      | 43.8      |
| 2014 | 5.1       | 0.5       | 18.0      | 1.5       | 0.5       | 0.6       | 20.8      | 5.3       | 41.9      | 20.3      | 11.4      | 17.3      | 44.4      |
| 2015 | 4.8       | 0.4       | 17.3      | 1.4       | 0.5       | 0.6       | 21.4      | 5.6       | 36.4      | 18.2      | 11.3      | 17.4      | 42.0      |
| 2016 | 4.3       | 0.4       | 16.7      | 1.3       | 0.5       | 0.5       | 19.8      | 5.5       | 33.0      | 18.4      | 9.7       | 15.7      | 39.7      |

Table A.2. Reduction in Weekly Hours Desired by Those Who Want Fewer Hours (Millions)

|      | <b>AU</b> | <b>BE</b> | <b>CH</b> | <b>CY</b> | <b>DE</b> | <b>DK</b> | <b>EE</b> | <b>ES</b> | <b>FI</b> | <b>FR</b> | <b>GR</b> | <b>HR</b> | <b>HU</b> |
|------|-----------|-----------|-----------|-----------|-----------|-----------|-----------|-----------|-----------|-----------|-----------|-----------|-----------|
| 2001 | -4.4      | -0.5      | -15.6     | -0.7      |           | -0.4      | -1.2      | -3.2      | -6.1      |           | -10.3     |           | -4.7      |
| 2002 | -1.7      | -0.5      | -14.7     | -0.8      |           | -0.1      | -1.0      | -1.5      | -6.7      |           | -11.2     | -0.3      | -4.8      |
| 2003 | -1.5      | -0.2      | -15.2     | -0.9      |           | -0.4      | -1.0      | -1.6      | -6.1      | -15.4     | -11.2     | -0.5      | -4.7      |
| 2004 | 0.0       | -0.4      | -15.3     | -1.0      |           | -0.4      | -1.0      | -4.3      | -6.4      | -15.4     | -11.9     | 0.0       | -5.4      |
| 2005 | -8.7      | -0.2      | -15.2     | -0.9      | -3.4      | -0.5      | -0.8      | -16.3     | -6.6      | -13.4     | -10.3     | 0.0       | -4.0      |
| 2006 | -8.8      | -0.2      | -15.6     | -0.8      | -1.4      | -0.5      | -0.9      | -19.2     | -6.3      | -15.3     | -9.9      | 0.0       | -3.4      |
| 2007 | -8.8      | -0.1      | -15.8     | -0.8      | -1.0      | -6.8      | -0.8      | -18.5     | -6.7      | -15.6     | -9.3      | 0.0       | -3.4      |
| 2008 | -8.6      | -0.1      | -16.5     | -0.4      | -53.2     | -6.5      | -0.6      | -13.7     | -5.6      | -15.4     | -8.9      | 0.0       | -3.3      |
| 2009 | -8.0      | -0.1      | -15.7     | -0.4      | -42.9     | -5.4      | -0.5      | -9.5      | -4.6      | -14.9     | -8.6      | 0.0       | -2.8      |
| 2010 | -8.6      | -0.1      | -18.6     | -0.4      | -41.7     | -4.9      | -0.7      | -9.0      | -4.5      | -15.7     | -8.2      | 0.0       | -2.8      |
| 2011 | -8.6      | -0.1      | -18.7     | -0.3      | -39.8     | -5.0      | -0.7      | -8.3      | -4.9      | -15.8     | -7.1      | 0.0       | -2.5      |
| 2012 | -8.3      | -0.1      | -18.0     | -0.3      | -38.5     | -4.7      | -0.7      | -7.1      | -4.8      | -13.7     | -6.4      | 0.0       | -2.1      |
| 2013 | -8.1      | -0.1      | -19.0     | -0.3      | -36.7     | -4.7      | -0.7      | -6.9      | -4.8      | -16.4     | -6.4      | 0.0       | -2.1      |
| 2014 | -8.0      | -0.1      | -18.9     | -0.3      | -36.5     | -4.4      | -0.7      | -6.2      | -4.6      | -16.8     | -6.3      | 0.0       | -2.1      |
| 2015 | -7.7      | -0.1      | -19.4     | -0.3      | -35.4     | -4.3      | -0.7      | -6.4      | -4.3      | -15.9     | -6.5      | 0.0       | -2.2      |
| 2016 | -8.3      | 0.0       | -20.1     | -0.3      | -37.4     | -7.8      | -0.9      | -7.2      | -5.0      | -17.4     | -6.6      | 0.0       | -2.7      |
|      | <b>IE</b> | <b>IS</b> | <b>IT</b> | <b>LT</b> | <b>LU</b> | <b>MT</b> | <b>NL</b> | <b>NO</b> | <b>PL</b> | <b>PT</b> | <b>RO</b> | <b>SE</b> | <b>UK</b> |
| 2001 | -0.6      | -0.4      |           | -2.8      | -0.3      |           | -13.6     | -0.1      | -39.2     | -3.2      |           | -5.2      | -31.2     |
| 2002 | -0.9      | -0.4      |           | -2.3      | -0.3      |           | -14.2     | -0.1      | -36.2     | -2.6      | -15.3     | -5.4      | -31.6     |
| 2003 | -0.8      | -0.2      |           | -1.8      | -0.1      |           | -12.8     | -0.1      | -30.0     | -1.9      | -14.7     | -5.0      | -32.6     |
| 2004 | -1.1      | -0.2      | -17.3     | -1.7      | -0.2      |           | -14.3     | -0.1      | -29.5     | -2.5      | -14.7     | -5.2      | -32.1     |
| 2005 | -1.4      | -0.2      | -10.2     | -1.5      | -0.2      |           | -15.3     | -0.1      | -26.5     | -1.7      | -10.9     | -8.5      | -30.4     |
| 2006 | -1.3      | -0.2      | -10.6     | -1.4      | -0.2      |           | -17.2     | -5.1      | -27.8     | -2.0      | -9.4      | -8.2      | -29.9     |
| 2007 | -1.4      | -0.2      | -9.9      | -1.5      | -0.2      |           | -17.7     | -4.9      | -28.1     | -2.2      | -8.9      | -7.8      | -30.8     |
| 2008 | -1.0      | 0.0       | -8.8      | -1.5      | -0.2      |           | -20.4     | -5.3      | -26.1     | -2.0      | -8.2      | -8.0      | -29.2     |
| 2009 | -0.7      | 0.0       | -5.5      | -1.0      | -0.6      | -0.1      | -20.3     | -4.6      | -24.0     | -1.8      | -7.0      | -7.5      | -27.2     |
| 2010 | -0.6      | 0.0       | -4.4      | -0.9      | -0.6      | -0.1      | -17.9     | -4.5      | -22.7     | -1.7      | -6.0      | -8.2      | -28.8     |
| 2011 | -0.7      | 0.0       | -3.9      | -0.8      | -0.6      | -0.1      | -17.0     | -4.5      | -21.0     | -1.9      | -6.7      | -8.0      | -27.5     |
| 2012 | -0.8      | 0.0       | -3.7      | -0.8      | -0.7      | -0.1      | -16.9     | -4.8      | -20.5     | -1.6      | -7.0      | -8.0      | -28.0     |
| 2013 | -1.0      | 0.0       | -3.7      | -0.8      | -0.7      | -0.1      | -17.6     | -4.8      | -19.0     | -1.8      | -6.7      | -8.3      | -28.2     |
| 2014 | -0.9      | -0.2      | -3.9      | -0.7      | -0.8      | -0.1      | -18.1     | -4.5      | -18.9     | -2.1      | -5.5      | -8.4      | -30.4     |
| 2015 | -0.8      | -0.2      | -4.2      | -0.9      | -1.1      | -0.1      | -18.3     | -4.7      | -18.9     | -2.2      | -5.1      | -8.5      | -32.0     |
| 2016 | -0.9      | -0.2      | -4.8      | -1.0      | -0.9      | -0.1      | -19.3     | -4.3      | -20.0     | -2.2      | -4.9      | -8.5      | -34.2     |

Notes: Key to Country Codes: AU = Austria; BE = Belgium, CH = Switzerland, CY = Cyprus, DE = Germany, DK = Denmark, EE = Estonia, ES = Spain, FI = Finland, FR = France, GR = Greece, HR = Croatia, HU = Hungary, IE = Ireland, IS = Iceland, IT = Italy, LT = Latvia, LU = Luxembourg, MT = Malta, NL = Netherlands, NO = Norway, PL = Poland, PT = Portugal, RO = Romania, SE = Sweden, UK = United Kingdom.

Table A.3. ILO Unemployment Rates

| GEO/TIME    | 2001 | 2002 | 2003 | 2004 | 2005 | 2006 | 2007 | 2008 | 2009 | 2010 | 2011 | 2012 | 2013 | 2014 | 2015 | 2016 | 2017 |
|-------------|------|------|------|------|------|------|------|------|------|------|------|------|------|------|------|------|------|
| Austria     | 4.0  | 4.9  | 4.8  | 5.8  | 5.6  | 5.3  | 4.9  | 4.1  | 5.3  | 4.8  | 4.6  | 4.9  | 5.4  | 5.6  | 5.7  | 6.0  | 5.5  |
| Belgium     | 6.2  | 6.9  | 7.7  | 7.4  | 8.5  | 8.3  | 7.5  | 7.0  | 7.9  | 8.3  | 7.2  | 7.6  | 8.4  | 8.5  | 8.5  | 7.8  | 7.1  |
| Switzerland | 2.5  | 2.9  | 4.1  | 4.3  | 4.5  | 4.0  | 3.7  | 3.4  | 4.1  | 4.8  | 4.4  | 4.5  | 4.8  | 4.9  | 4.8  | 5.0  | 4.8  |
| Cyprus      | 4.0  | 3.3  | 4.2  | 4.4  | 5.3  | 4.6  | 3.9  | 3.7  | 5.4  | 6.3  | 7.9  | 11.9 | 15.9 | 16.1 | 15.0 | 13.0 | 11.1 |
| Germany     | 7.8  | 8.5  | 9.8  | 10.7 | 11.2 | 10.3 | 8.7  | 7.5  | 7.8  | 7.0  | 5.8  | 5.4  | 5.2  | 5.0  | 4.6  | 4.1  | 3.8  |
| Denmark     | 4.2  | 4.3  | 5.4  | 5.2  | 4.8  | 3.9  | 3.8  | 3.4  | 6.0  | 7.5  | 7.6  | 7.5  | 7.0  | 6.6  | 6.2  | 6.2  | 5.7  |
| Estonia     | 13.1 | 10.0 | 11.3 | 10.2 | 8.0  | 5.9  | 4.6  | 5.5  | 13.5 | 16.7 | 12.3 | 10.0 | 8.6  | 7.4  | 6.2  | 6.8  | 5.8  |
| Spain       | 10.4 | 11.2 | 11.3 | 11.1 | 9.2  | 8.5  | 8.2  | 11.3 | 17.9 | 19.9 | 21.4 | 24.8 | 26.1 | 24.5 | 22.1 | 19.6 | 17.2 |
| Finland     | 10.3 | 10.4 | 10.5 | 10.4 | 8.4  | 7.7  | 6.9  | 6.4  | 8.2  | 8.4  | 7.8  | 7.7  | 8.2  | 8.7  | 9.4  | 8.8  | 8.6  |
| France      | 8.6  | 8.7  | 8.3  | 8.9  | 8.5  | 8.5  | 7.7  | 7.1  | 8.7  | 8.9  | 8.8  | 9.4  | 9.9  | 10.3 | 10.4 | 10.1 | 9.4  |
| Greece      | 10.5 | 10.0 | 9.4  | 10.3 | 10.0 | 9.0  | 8.4  | 7.8  | 9.6  | 12.7 | 17.9 | 24.5 | 27.5 | 26.5 | 24.9 | 23.6 | 21.5 |
| Croatia     |      | 15.1 | 14.0 | 13.7 | 12.7 | 11.2 | 9.9  | 8.6  | 9.2  | 11.7 | 13.7 | 16.0 | 17.3 | 17.3 | 16.2 | 13.1 | 11.2 |
| Hungary     | 5.7  | 5.6  | 5.8  | 5.8  | 7.2  | 7.5  | 7.4  | 7.8  | 10.0 | 11.2 | 11.0 | 11.0 | 10.2 | 7.7  | 6.8  | 5.1  | 4.2  |
| Ireland     | 3.7  | 4.2  | 4.5  | 4.5  | 4.4  | 4.4  | 5.0  | 6.8  | 12.6 | 14.6 | 15.4 | 15.5 | 13.8 | 11.9 | 9.9  | 8.4  | 6.7  |
| Iceland     | 1.9  | 3.0  | 4.0  | 4.0  | 2.5  | 2.8  | 2.3  | 2.9  | 7.2  | 7.6  | 7.0  | 6.0  | 5.4  | 4.9  | 4.0  | 3.0  | 2.7  |
| Italy       | 9.6  | 9.2  | 8.9  | 7.9  | 7.7  | 6.8  | 6.1  | 6.7  | 7.8  | 8.4  | 8.4  | 10.7 | 12.2 | 12.7 | 11.9 | 11.7 | 11.2 |
| Latvia      | 13.9 | 13.8 | 12.1 | 11.7 | 10.0 | 7.0  | 6.1  | 7.7  | 17.5 | 19.5 | 16.2 | 15.0 | 11.9 | 10.8 | 9.9  | 9.6  | 8.7  |
| Lithuania   | 1.8  | 2.6  | 3.7  | 5.1  | 4.5  | 4.7  | 4.1  | 5.1  | 5.1  | 4.4  | 4.9  | 5.1  | 5.9  | 5.9  | 6.7  | 6.3  | 5.5  |
| Malta       | 7.1  | 6.9  | 7.5  | 7.3  | 6.9  | 6.8  | 6.5  | 6.0  | 6.9  | 6.9  | 6.4  | 6.3  | 6.4  | 5.8  | 5.4  | 4.7  | 4.0  |
| Netherlands | 2.1  | 2.6  | 3.6  | 4.7  | 4.7  | 3.9  | 3.2  | 2.8  | 3.4  | 4.5  | 5.0  | 5.8  | 7.3  | 7.4  | 6.9  | 6.0  | 4.9  |
| Norway      | 3.7  | 4.0  | 4.2  | 4.3  | 4.4  | 3.4  | 2.5  | 2.5  | 3.1  | 3.5  | 3.2  | 3.1  | 3.4  | 3.5  | 4.3  | 4.7  | 4.2  |
| Poland      | 18.4 | 20.0 | 19.4 | 19.1 | 17.8 | 13.9 | 9.6  | 7.1  | 8.2  | 9.7  | 9.7  | 10.1 | 10.3 | 9.0  | 7.5  | 6.2  | 4.9  |
| Portugal    | 3.9  | 4.6  | 6.2  | 6.4  | 7.7  | 7.8  | 8.1  | 7.7  | 9.6  | 11.0 | 12.9 | 15.8 | 16.4 | 14.1 | 12.6 | 11.2 | 9.0  |
| Romania     | 6.7  | 8.3  | 6.9  | 7.7  | 7.2  | 7.3  | 6.4  | 5.8  | 6.9  | 7.0  | 7.2  | 6.8  | 7.1  | 6.8  | 6.8  | 5.9  | 4.9  |
| Sweden      | 4.7  | 5.0  | 5.6  | 6.7  | 7.8  | 7.1  | 6.2  | 6.2  | 8.4  | 8.6  | 7.8  | 8.0  | 8.1  | 8.0  | 7.4  | 7.0  | 6.7  |
| UK          | 4.7  | 5.0  | 4.8  | 4.6  | 4.8  | 5.4  | 5.3  | 5.6  | 7.6  | 7.8  | 8.1  | 7.9  | 7.5  | 6.1  | 5.3  | 4.8  | 4.4  |

Source: Eurostat, [https://ec.europa.eu/eurostat/statistics-explained/index.php?title=Unemployment\\_statistics](https://ec.europa.eu/eurostat/statistics-explained/index.php?title=Unemployment_statistics).

Table A.4. State Level *Weekly Wage Equations* with Various Measures of Labor Market Slack, 1980–2017, with Robust Standard Errors

**a) Unemployment rate and involuntary part time**

|               | 1980–2017     | 1980–2007     | 2008–2017     | 1980–2017     | 1980–2007     | 2008–2017     |
|---------------|---------------|---------------|---------------|---------------|---------------|---------------|
| Log $W_{t-1}$ | .7346 (28.34) | .7263 (27.06) | .3257 (5.84)  | .7125 (24.38) | .7049 (25.55) | .3199 (6.07)  |
| Log $U3_t$    | -.0312 (7.47) | -.0295 (6.62) | -.0377 (2.81) |               |               |               |
| Log PTFER     |               |               |               | -.0307 (8.21) | -.0309 (7.90) | -.0338 (4.15) |
| $N$           | 1938          | 1428          | 510           | 1938          | 1428          | 510           |
| $R^2$ within  | .9971         | .9959         | .9237         | .9972         | .9960         | .9250         |
| $R^2$ between | .9518         | .9576         | .5553         | .9696         | .9664         | .6595         |
| $R^2$ overall | .9927         | .9898         | .6412         | .9941         | .9908         | .7077         |

**b) Using alternative measure U6–U9**

|               | 2003–2017     | 2003–2017     | 2003–2017     | 2003–2017     | 2008–2017     | 2008–2017     | 2008–2017     | 2008–2017     |
|---------------|---------------|---------------|---------------|---------------|---------------|---------------|---------------|---------------|
| Log $W_{t-1}$ | .4701 (11.62) | .4638 (11.83) | .4641 (11.98) | .4632 (11.91) | .3107 (5.84)  | .3036 (5.99)  | .3031 (5.93)  | .3010 (5.78)  |
| Log $U6_t$    | -.0490 (5.40) | -.0145 (0.90) |               |               | -.0550 (3.47) |               |               |               |
| Log $U7_t$    |               | -.0335 (2.94) | -.0435 (6.49) | -.0373 (5.08) |               | -.0478 (4.04) | -.0410 (3.32) | -.0427 (3.39) |
| Log $U3_t$    |               |               |               | -.0113 (1.35) |               |               | -.0144 (1.03) | -.0165 (1.29) |
| Log $U8_t$    |               |               |               | -.0006 (0.34) |               |               |               | .0029 (1.88)  |
| Log $U9_t$    |               |               |               | .0030 (0.69)  |               |               |               | .0014 (0.25)  |
| $N$           | 765           | 765           | 765           | 765           | 510           | 510           | 510           | 510           |
| $R^2$ within  | .9710         | .9714         | .9714         | .9714         | .9255         | .9264         | .9267         | .9270         |
| $R^2$ between | .8791         | .9014         | .9071         | .8971         | .5594         | .6587         | .5986         | .6037         |
| $R^2$ overall | .9135         | .9249         | .9280         | .9927         | .6403         | .7069         | .6684         | .6716         |

**c) Weekly wages and change in the home ownership rate, with robust standard errors**

|               | 1980–2017     | 1980–2007     | 2008–2017     | 2003–2017     | 2008–2017     | 2008–2017    |
|---------------|---------------|---------------|---------------|---------------|---------------|--------------|
| Log $W_{t-1}$ | .6513 (17.56) | .6011 (12.88) | .3212 (6.09)  | .4670 (12.09) | .3105 (6.09)  | .3108 (6.15) |
| Log $U3_t$    | -.0086 (1.67) | -.0022 (0.36) | -.0255 (1.83) | -.0104 (1.15) | -.0157 (1.12) |              |
| Log PTFER     | -.0252 (5.24) | -.0236 (4.23) | -.0246 (2.96) |               |               |              |

|                                  |              |              |              |               |               |               |
|----------------------------------|--------------|--------------|--------------|---------------|---------------|---------------|
| Log $U7_t$                       |              |              |              | −.0363 (4.90) | −.0384 (3.17) | −.0457 (3.93) |
| Log Home $_t$ −Log Home $_{t-1}$ | .1270 (3.49) | .1002 (2.44) | .1724 (2.90) | .1314 (2.87)  | .1759 (3.15)  | .1728 (3.01)  |
| $N$                              | 1,683        | 1,173        | 510          | 765           | 510           | 510           |
| $R^2$ within                     | .9960        | .9939        | .9276        | .9718         | .9283         | .9280         |
| $R^2$ between                    | .9578        | .9504        | .5382        | .9001         | .5824         | .6485         |
| $R^2$ overall                    | .9894        | .9810        | .6288        | .9245         | .6579         | .7005         |

*Notes:* All equations include a full set of year and state effects plus 21 personal controls—15 education variables, age, gender, and four race variables. U3 is the unemployment rate. PTFER is part time for economic reasons as a percentage of employment calculated from the MORG files (weighted using variable = weight). U7 is involuntary PT as a percentage of the civilian labor force. U8 is discouraged workers as a percentage of the civilian labor force U9 is all marginally attached as a percentage of the civilian labor force.

**Table A.5. Additional Information Required to Justify the Assumption that the Unemployed Would Work the Same Hours on Average as the Currently Employed**

```
. regress hwusual sex age agesq i.ieduc i.refyear i.country if age > 16 &
ilostat == 1 & ieduc != 9
```

| Source   | SS         | df       | MS         | Number of obs     | = | 17014591 |
|----------|------------|----------|------------|-------------------|---|----------|
| Model    | 377615274  | 35       | 10789007.8 | $F(35, 17014555)$ | = | 76634.68 |
| Residual | 2.3954e+09 | 17014555 | 140.784922 | Prob > $F$        | = | 0.0000   |
|          |            |          |            | R-squared         | = | 0.1362   |
|          |            |          |            | Adj R-squared     | = | 0.1362   |
| Total    | 2.7730e+09 | 17014590 | 162.978248 | Root MSE          | = | 11.865   |

| hwusual  | Coef.     | Std. Err. | t        | P> t  | [95% Conf. Interval] |           |
|----------|-----------|-----------|----------|-------|----------------------|-----------|
| sex      | -6.111863 | .0058159  | -1050.89 | 0.000 | -6.123262            | -6.100464 |
| age      | 1.021285  | .0013863  | 736.67   | 0.000 | 1.018568             | 1.024002  |
| agesq    | -.0118742 | .0000163  | -730.51  | 0.000 | -.011906             | -.0118423 |
| ieduc    |           |           |          |       |                      |           |
| L        | -1.59341  | .0081365  | -195.84  | 0.000 | -1.609357            | -1.577462 |
| M        | -.3053178 | .0072921  | -41.87   | 0.000 | -.3196101            | -.2910254 |
| refyear  |           |           |          |       |                      |           |
| 1999     | -.1977689 | .0264708  | -7.47    | 0.000 | -.2496507            | -.1458871 |
| 2000     | -.3507154 | .0263731  | -13.30   | 0.000 | -.4024057            | -.2990251 |
| 2001     | -.4200781 | .0258516  | -16.25   | 0.000 | -.4707464            | -.3694098 |
| 2002     | -.4890754 | .0257804  | -18.97   | 0.000 | -.5396042            | -.4385467 |
| 2003     | .2434503  | .0263354  | 9.24     | 0.000 | .1918339             | .2950668  |
| 2004     | .0076015  | .0261762  | 0.29     | 0.772 | -.043703             | .0589059  |
| 2005     | -.4284576 | .0209761  | -20.43   | 0.000 | -.46957              | -.3873453 |
| 2006     | -.3226952 | .0217842  | -14.81   | 0.000 | -.3653914            | -.2799989 |
| 2007     | -.3196307 | .0217277  | -14.71   | 0.000 | -.3622163            | -.2770451 |
| 2008     | -.1346552 | .0217341  | -6.20    | 0.000 | -.1772532            | -.0920571 |
| 2009     | -.3237646 | .0217788  | -14.87   | 0.000 | -.3664503            | -.2810788 |
| 2010     | -.4821226 | .0216578  | -22.26   | 0.000 | -.5245711            | -.4396742 |
| 2011     | -.5479243 | .0217237  | -25.22   | 0.000 | -.590502             | -.5053466 |
| 2012     | -.6462469 | .0218482  | -29.58   | 0.000 | -.6890686            | -.6034252 |
| 2013     | -.7024571 | .0219505  | -32.00   | 0.000 | -.7454793            | -.6594349 |
| 2014     | -.7653292 | .0219525  | -34.86   | 0.000 | -.8083554            | -.722303  |
| 2015     | -.7817403 | .0219754  | -35.57   | 0.000 | -.8248112            | -.7386693 |
| 2016     | -.6445245 | .0219963  | -29.30   | 0.000 | -.6876365            | -.6014126 |
| icountry |           |           |          |       |                      |           |
| BE       | -4.403054 | .0186288  | -236.36  | 0.000 | -4.439566            | -4.366542 |
| DK       | -3.744345 | .0180689  | -207.23  | 0.000 | -3.779759            | -3.70893  |
| ES       | .162434   | .0156645  | 10.37    | 0.000 | .1317322             | .1931359  |
| FI       | .0424858  | .021859   | 1.94     | 0.052 | -.0003572            | .0853287  |
| FR       | -1.032941 | .0130195  | -79.34   | 0.000 | -1.058458            | -1.007423 |
| GR       | 4.549584  | .0146877  | 309.76   | 0.000 | 4.520797             | 4.578371  |
| IT       | -.6106633 | .0125912  | -48.50   | 0.000 | -.6353416            | -.585985  |
| NL       | -7.101879 | .0156424  | -454.01  | 0.000 | -7.132538            | -7.071221 |
| NO       | -3.529512 | .0238674  | -147.88  | 0.000 | -3.576292            | -3.482733 |
| PT       | 2.287623  | .0163103  | 140.26   | 0.000 | 2.255655             | 2.31959   |
| RO       | -4.472456 | .0146439  | -305.42  | 0.000 | -4.501158            | -4.443755 |
| SE       | -.9454173 | .0134838  | -70.12   | 0.000 | -.9718449            | -.9189896 |
| _cons    | 27.4283   | .0367086  | 747.19   | 0.000 | 27.35635             | 27.50025  |

Hours of the unemployed calculated from the predicted values equals 36.06

```
predict hours_unemp if ilostat == 2
(option xb assumed; fitted values)
(49,348,771 missing values generated)
```

```
. sum hours_unemp, det
```

| Fitted values |             |          |             |           |
|---------------|-------------|----------|-------------|-----------|
| -----         |             |          |             |           |
|               | Percentiles | Smallest |             |           |
| 1%            | 24.66239    | .1434651 |             |           |
| 5%            | 27.73668    | .341234  |             |           |
| 10%           | 30.06632    | .6011819 | Obs         | 1,648,475 |
| 25%           | 33.00655    | 6.255328 | Sum of Wgt. | 1,648,475 |
| 50%           | 35.97066    |          | Mean        | 36.06221  |
|               |             | Largest  | Std. Dev.   | 4.691073  |
| 75%           | 39.68262    | 48.05743 |             |           |
| 90%           | 41.61391    | 48.05743 | Variance    | 22.00616  |
| 95%           | 43.42683    | 48.05743 | Skewness    | -.2106698 |
| 99%           | 46.36205    | 48.05743 | Kurtosis    | 2.940897  |

Usual hours of current workers = 36.16

```
. sum hwusual, det
```

| HWUSUAL |             |          |             |            |
|---------|-------------|----------|-------------|------------|
| -----   |             |          |             |            |
|         | Percentiles | Smallest |             |            |
| 1%      | 0           | 0        |             |            |
| 5%      | 8           | 0        |             |            |
| 10%     | 18          | 0        | Obs         | 22,030,676 |
| 25%     | 34          | 0        | Sum of Wgt. | 22030676   |
| 50%     | 40          |          | Mean        | 36.16291   |
|         |             | Largest  | Std. Dev.   | 13.11152   |
| 75%     | 40          | 80       |             |            |
| 90%     | 50          | 80       | Variance    | 171.9119   |
| 95%     | 55          | 80       | Skewness    | -.5141681  |
| 99%     | 70          | 80       | Kurtosis    | 4.778626   |



Figure A.1. Annual Growth in Weekly Earnings of Production and Nonsupervisory Workers and U7, 1965–2018

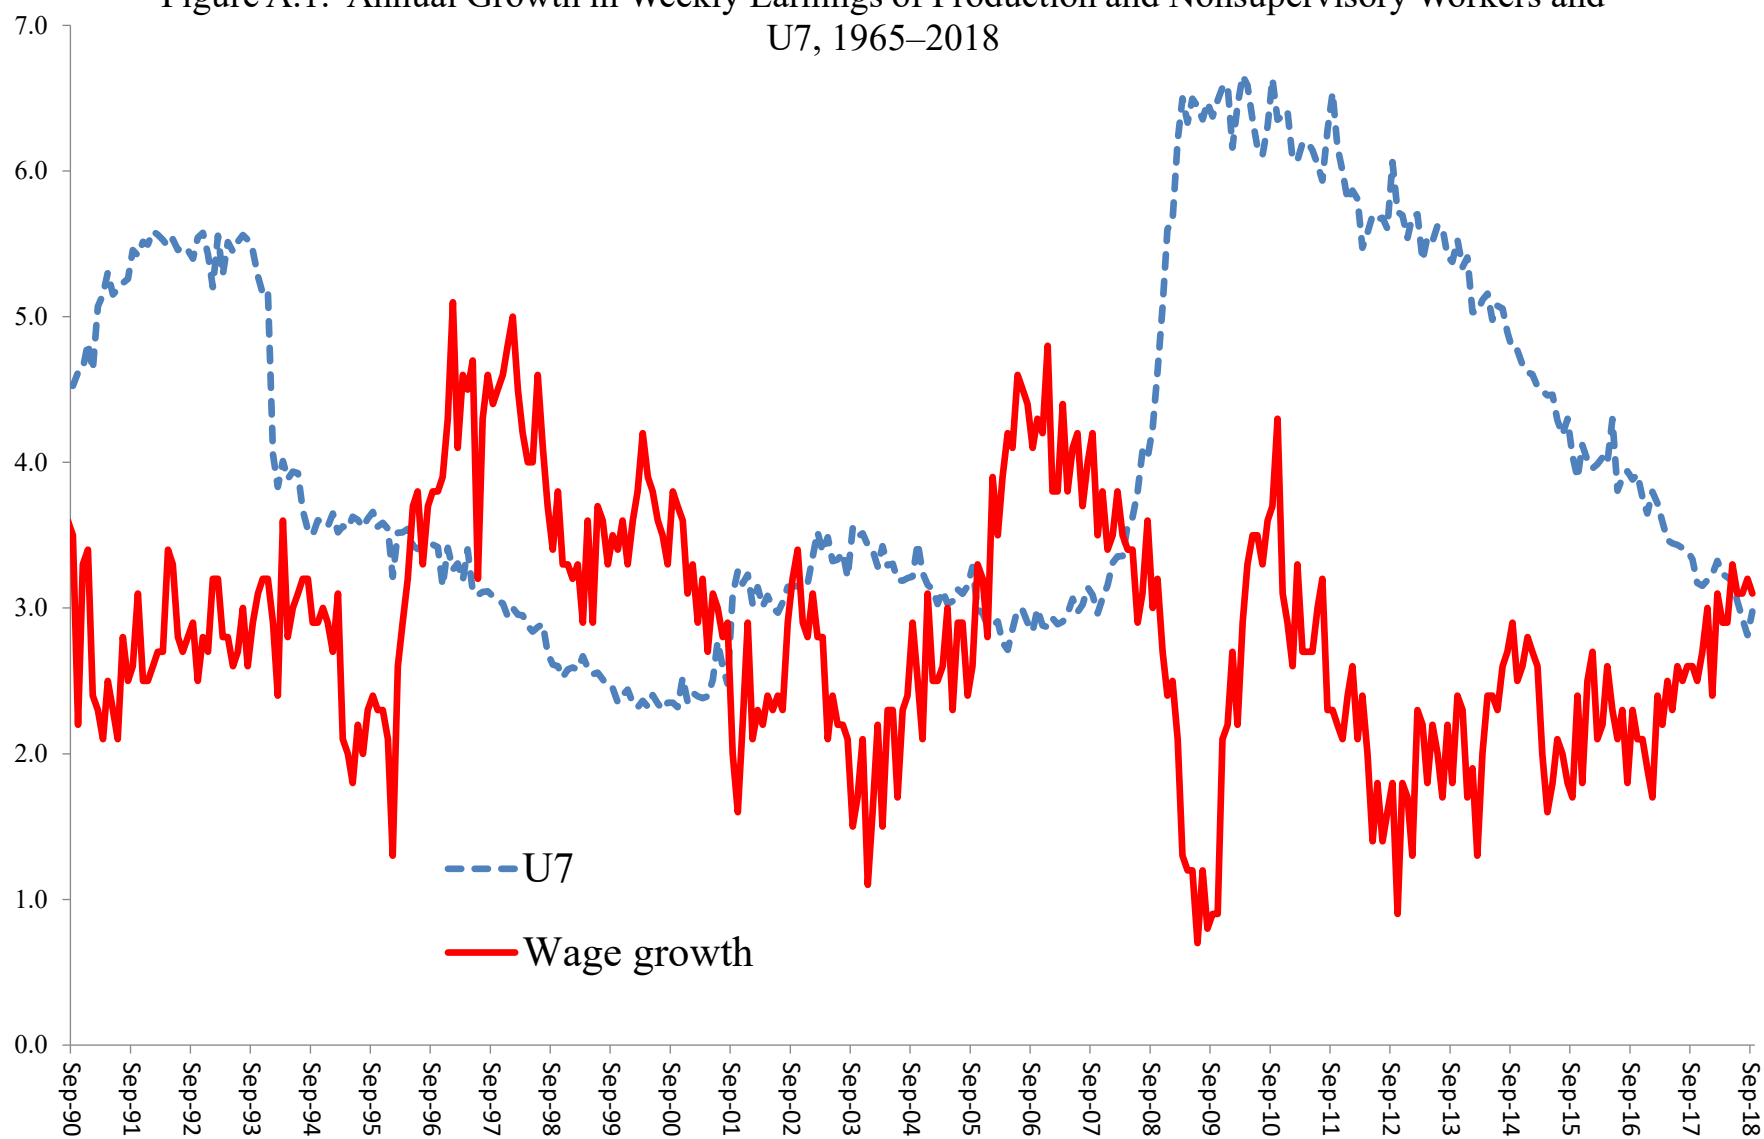

Supplement: Supplementary file 1 [file 19497338]
